# Supplementary material for: Control of Germline torso Expression by the BTB/POZ Domain Protein Pipsqueak Is Required for Embryonic Terminal Patterning in Drosophila
Source: Oxford University Press journal article supplement (doi:10.1534/genetics.110.121624), 2010-11-24
Supplement: 121624_si.pdf [file 121624_si.pdf]

# GENETICS

## Supporting Information

<http://www.genetics.org/cgi/content/full/genetics.110.121624/DC1>

### **Control of Germline *torso* Expression by the BTB/POZ Domain Protein Pipsqueak Is Required for Embryonic Terminal Patterning in *Drosophila***

**Marco Grillo, Marc Furriols, Jordi Casanova and Stefan Luschig**

Copyright © 2011 by the Genetics Society of America  
DOI: 10.1534/genetics.110.121624

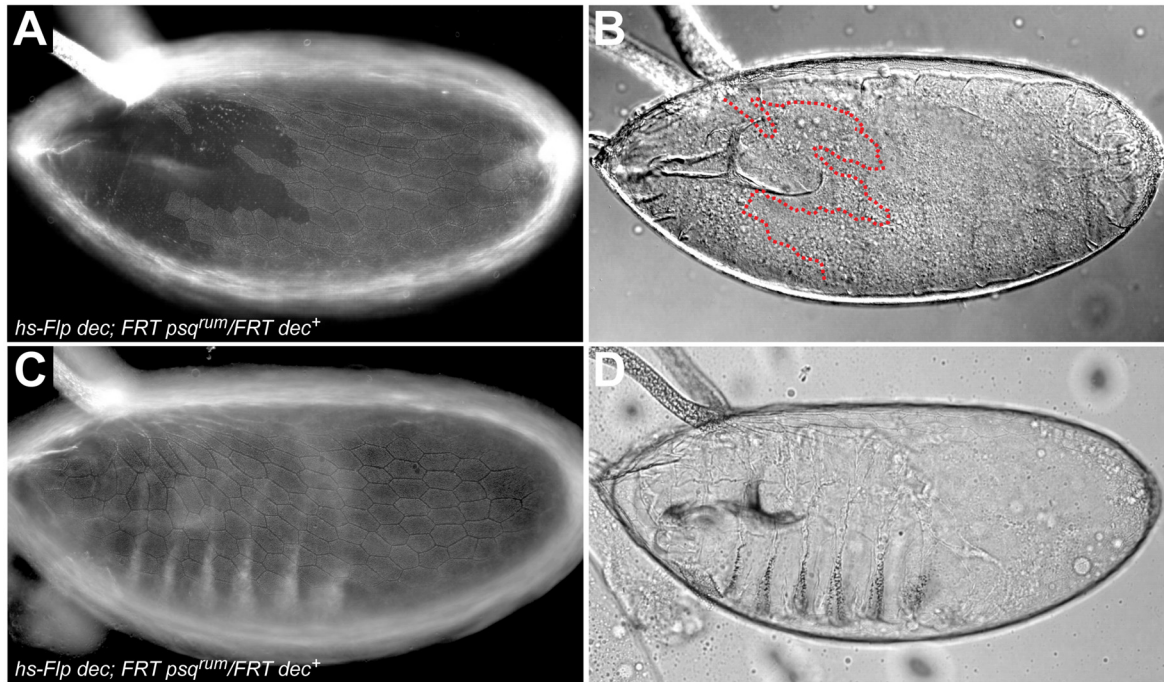

FIGURE S1.—*psq<sup>rum</sup>* mutant follicle cell clones do not affect terminal patterning. (A,B) *psq<sup>rum</sup>* somatic clones in the follicle epithelium do not affect terminal regions in the embryo. *psq<sup>rum</sup>* mutant follicle cells are marked by the loss of the *dec<sup>+</sup>* marker, resulting in a transparent chorion. A large *dec<sup>-</sup>; psq<sup>rum</sup>* clone covers the anterior part of the egg shown in (A). Note the presence of a normal head skeleton in the phase contrast view shown in (B). The border of the clone is indicated by a hatched red line in (B). (C,D) Conversely, *psq<sup>rum</sup>* germline clones produce terminal phenotypes even when somatic follicle cells are wild-type as detected by the absence of *dec<sup>-</sup>* clones. (A) and (C) are dark-field images. (B) and (D) are phase-contrast images of the embryos shown in (A) and (C), respectively.

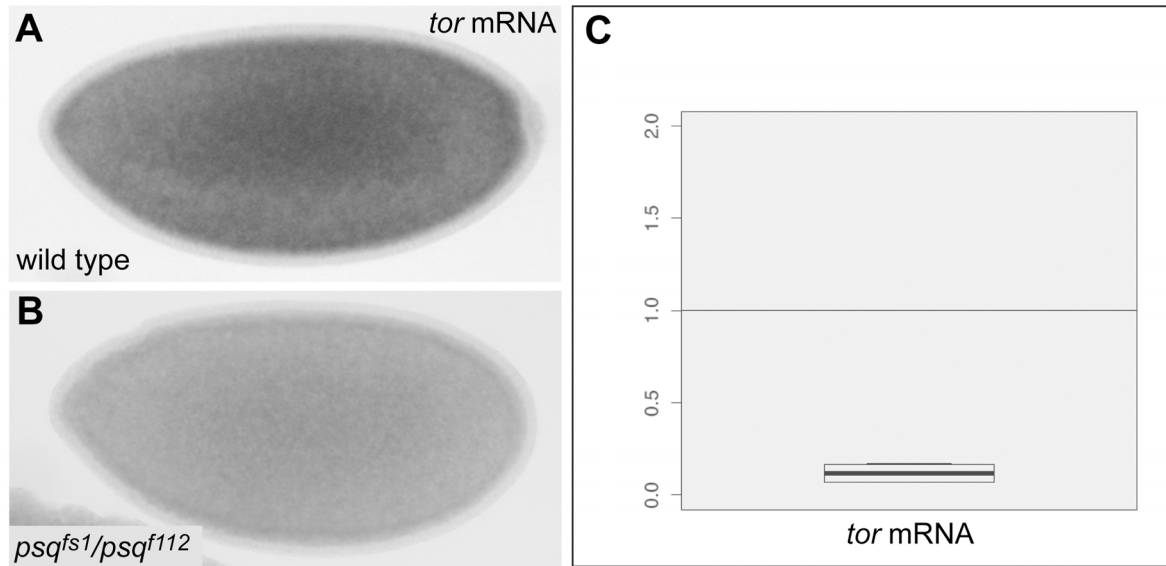

FIGURE S2.—*tor* mRNA levels are reduced in ovaries and embryos from *psq<sup>fs1</sup>/psq<sup>f112</sup>* transheterozygous females (A,B) *tor* *in situ* hybridization in wild-type embryo (A) and *psq<sup>fs1</sup>/psq<sup>f112</sup>* mutant (B). *tor* mRNA levels are strongly reduced in *psq<sup>fs1</sup>/psq<sup>f112</sup>* embryos. (C) *tor* mRNA is eight-fold reduced in *psq<sup>fs1</sup>/psq<sup>f112</sup>* ovaries compared to the wild type, as detected by real-time PCR. The Y-axis indicates relative transcript levels as fold-change between wild-type and *psq<sup>fs1</sup>/psq<sup>f112</sup>* ovaries.

TABLE S1

**Analysis of heteroallelic combinations between *psq<sup>rum</sup>* and other *psq* alleles or deficiencies uncovering *psq***

| <i>psq</i> alleles or deficiencies | homozygous phenotype                                                                                                                                            | maternal-effect phenotype of heteroallelic combination with <i>psq<sup>rum</sup></i>                                    | nature of mutation                                                                                                                                                                                                                                                                           | reference                       |
|------------------------------------|-----------------------------------------------------------------------------------------------------------------------------------------------------------------|-------------------------------------------------------------------------------------------------------------------------|----------------------------------------------------------------------------------------------------------------------------------------------------------------------------------------------------------------------------------------------------------------------------------------------|---------------------------------|
| <i>psq[rum]</i>                    | All embryos show terminal defects (lack of structures posterior to A7; n=100). In addition embryos frequently show deletions of one or more abdominal segments. |                                                                                                                         | EMS-induced; G to A nucleotide substitution affecting the splicing donor site of intron 6, which is common to all known <i>psq</i> transcripts. This leads to partial retention of the intron in the mRNA and is predicted to cause the addition of 16 amino acids followed by a stop codon. | this work                       |
| <i>psq[8109]</i>                   | Decreased viability of adults, female sterile, posterior group, dorsalized eggshell and embryo, early oogenesis defects.                                        | 96% of embryos show little cuticle, 4% of embryos develop contiguous cuticle and lack terminal structures (n=100)       | P{PZ} insertion into the largest intron of <i>psq-1</i> . Aberrant fusion protein created.                                                                                                                                                                                                   | HOROWITZ and BERG 1995          |
| <i>psq[0115]</i>                   | Decreased viability of adults, female sterile, posterior group, dorsalized eggshell and embryo, early oogenesis defects.                                        | 94% of embryos show little or no cuticle, 6% of embryos develop contiguous cuticle and lack terminal structures (n=100) | P{PZ} insertion into the largest intron of <i>psq-1</i> . Aberrant fusion protein created.                                                                                                                                                                                                   | HOROWITZ and BERG 1995          |
| <i>psq[fs1]</i>                    | Female sterile, posterior group, grandchildless                                                                                                                 | Embryos do not hatch. 80% of embryos lack segment A8 and/or spiracles (n=50)                                            | P{lacW} insertion into the first intron of <i>psq-1</i> .                                                                                                                                                                                                                                    | SIEGEL <i>et al.</i> 1993       |
| <i>psq[rev2]</i>                   | n.d. *                                                                                                                                                          | Fertile                                                                                                                 | Isolated as EMS-induced revertant of <i>psq</i> overexpression in the eye. Deletion of 11 bp, resulting in a premature stop codon in the BTB domain. The P{GSV1}lola[GS88A8] insertion is still present on the chromosome.                                                                   | FERRES-MARCO <i>et al.</i> 2006 |

|                   |        |                                                                                                                                          |                                                                                                                                                                                                                                                                                                                                                                                                                                                                   |                                 |
|-------------------|--------|------------------------------------------------------------------------------------------------------------------------------------------|-------------------------------------------------------------------------------------------------------------------------------------------------------------------------------------------------------------------------------------------------------------------------------------------------------------------------------------------------------------------------------------------------------------------------------------------------------------------|---------------------------------|
| <i>psq[rev4]</i>  | n.d. * | Many collapsed eggs. 6.25% of embryos develop contiguous cuticle. These embryos lack abdominal segments (n=80).                          | Isolated as EMS-induced revertant of <i>psq</i> overexpression in the eye. Nucleotide substitution causing a Q530>stop mutation. The P{GSV1}lola[GS88A8] insertion is still present on the chromosome.                                                                                                                                                                                                                                                            | FERRES-MARCO <i>et al.</i> 2006 |
| <i>psq[rev7]</i>  | n.d. * | Fertile                                                                                                                                  | Isolated as EMS-induced revertant of <i>psq</i> overexpression in the eye. Amino acid replacement M1I in the start Methionine of Psq1. The P{GSV1}lola[GS88A8] insertion is still present on the chromosome.                                                                                                                                                                                                                                                      | FERRES-MARCO <i>et al.</i> 2006 |
| <i>psq[rev9]</i>  | n.d. * | Weakly fertile. Adults show narrow blistered wings with extra veins. Embryos do not show terminal or other morphological defects (n=50). | Isolated as EMS-induced revertant of <i>psq</i> overexpression in the eye. G to A nucleotide substitution affecting the splicing donor site of intron 2 (72 bp), leading to retention of the intron in the mRNA. This causes the in-frame addition of 24 amino acids within the BTB/POZ domain, presumably disrupting the conserved BTB pocket domain, which is important for dimerization. The P{GSV1}lola[GS88A8] insertion is still present on the chromosome. | FERRES-MARCO <i>et al.</i> 2006 |
| <i>psq[rev12]</i> | n.d. * | 90% of embryos show little or no cuticle, 10% of embryos develop contiguous cuticle and lack terminal structures (n=80)                  | Isolated as EMS-induced revertant of <i>psq</i> overexpression in the eye. Amino acid replacement G867D in the third PSQ repeat. The P{GSV1}lola[GS88A8] insertion is still present on the chromosome.                                                                                                                                                                                                                                                            | FERRES-MARCO <i>et al.</i> 2006 |

|                     |                                                         |                                                                                                                                    |                                                                                                                                                                                                        |                                 |
|---------------------|---------------------------------------------------------|------------------------------------------------------------------------------------------------------------------------------------|--------------------------------------------------------------------------------------------------------------------------------------------------------------------------------------------------------|---------------------------------|
| <i>psq[rev14]</i>   | n.d. *                                                  | 98% of embryos show little or no cuticle, 2% of embryos develop contiguous cuticle and show posterior and terminal defects (n=100) | Isolated as EMS-induced revertant of <i>psq</i> overexpression in the eye. Nucleotide substitution causing a Q582>stop mutation. The P{GSV1}lola[GS88A8] insertion is still present on the chromosome. | FERRES-MARCO <i>et al.</i> 2006 |
| <i>psq[KG02404]</i> | Viable, female-sterile                                  | Embryos do not hatch, 60% of embryos lack segment A8 and/or spiracles (n=50)                                                       | P{SUPor-P} insertion in <i>psq-1</i> 5'-UTR                                                                                                                                                            | BELLEN <i>et al.</i> 2004       |
| <i>psq[KG00811]</i> | Lethal                                                  | Fertile                                                                                                                            | P{SUPor-P} insertion in the largest intron of <i>psq-1</i> , 0.7 kb downstream of the transcription start site of <i>psq-3</i> transcripts                                                             | BELLEN <i>et al.</i> 2004       |
| <i>psq[EP2011]</i>  | Viable, female-sterile. Homozygous females lay no eggs. | Embryos do not develop cuticle (n=100).                                                                                            | P{EP} insertion in the largest intron of <i>psq-1</i> , 71 bp upstream of the transcription start site of <i>psq-3</i> transcripts                                                                     | BELLEN <i>et al.</i> 2004       |
| <i>Df(2R)47A</i>    |                                                         | Most embryos undeveloped, few embryos with little cuticle                                                                          |                                                                                                                                                                                                        | FlyBase                         |
| <i>Df(2R)E3363</i>  |                                                         | Most embryos undeveloped, few embryos develop and show terminal defects                                                            |                                                                                                                                                                                                        | FlyBase                         |

Phenotypes of embryos from females carrying heteroallelic combinations of *psq<sup>um</sup>* are indicated. \*: We were unable to determine homozygous phenotypes of the *psq* revertant alleles, all of which are lethal in homozygous state and in all trans-heterozygous combinations tested. Lethality of these chromosomes is presumably due to the presence of additional mutations or due to the P{GSV1}lola[GS88A8] P-element insertion.

#### REFERENCES:

- BELLEN, H. J., R. W. LEVIS, G. LIAO, Y. HE, J. W. CARLSON *et al.*, 2004 The BDGP gene disruption project: single transposon insertions associated with 40% of Drosophila genes. *Genetics* **167**: 761-781.
- FERRES-MARCO, D., I. GUTIERREZ-GARCIA, D. M. VALLEJO, J. BOLIVAR, F. J. GUTIERREZ-AVIÑO *et al.*, 2006 Epigenetic silencers and Notch collaborate to promote malignant tumours by Rb silencing. *Nature* **439**: 430-436.
- HOROWITZ, H., and C. A. BERG, 1995 Aberrant splicing and transcription termination caused by P element insertion into the intron of a Drosophila gene. *Genetics* **139**: 327-335.
- SIEGEL, V., T. A. JONGENS, L. Y. JAN and Y. N. JAN, 1993 pipsqueak, an early acting member of the posterior group of genes, affects vasa level and germ cell-somatic cell interaction in the developing egg chamber. *Development* **119**: 1187-1202.
