# Supplementary material for: Control of Germline torso Expression by the BTB/POZ Domain Protein Pipsqueak Is Required for Embryonic Terminal Patterning in Drosophila
Source: Oxford University Press journal article supplement (doi:10.1534/genetics.110.121624), 2010-11-24
Supplement: figures1.pdf [file figures1.pdf]

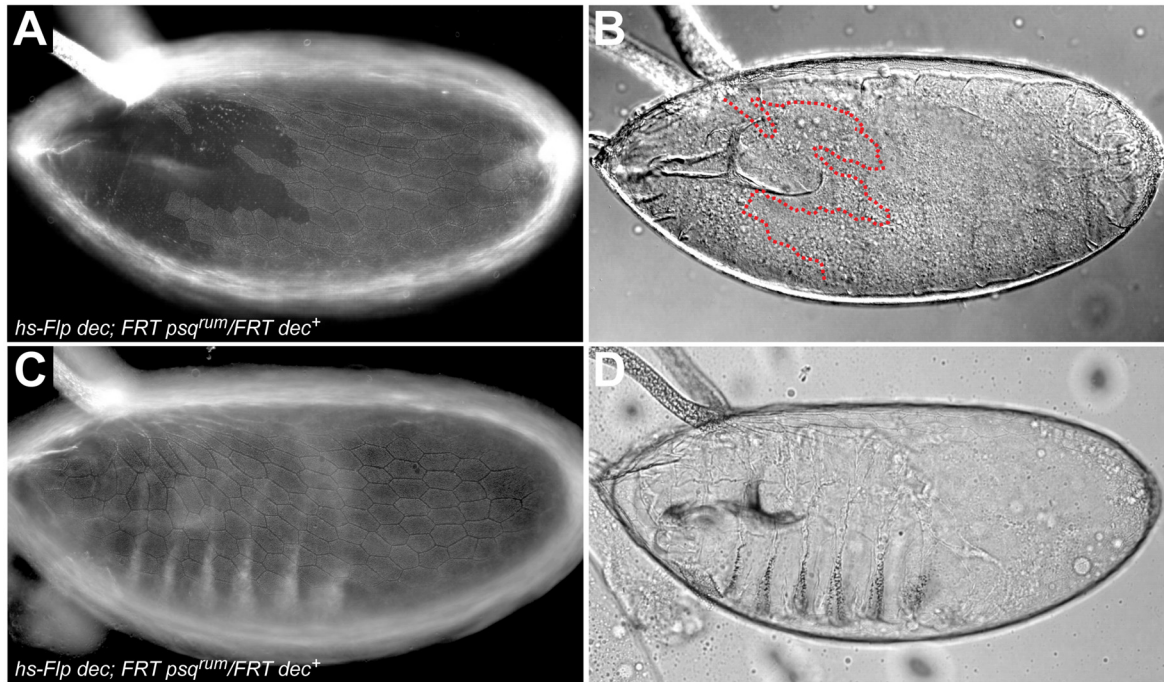

FIGURE S1.—*psq<sup>rum</sup>* mutant follicle cell clones do not affect terminal patterning. (A,B) *psq<sup>rum</sup>* somatic clones in the follicle epithelium do not affect terminal regions in the embryo. *psq<sup>rum</sup>* mutant follicle cells are marked by the loss of the *dec<sup>+</sup>* marker, resulting in a transparent chorion. A large *dec<sup>-</sup>; psq<sup>rum</sup>* clone covers the anterior part of the egg shown in (A). Note the presence of a normal head skeleton in the phase contrast view shown in (B). The border of the clone is indicated by a hatched red line in (B). (C,D) Conversely, *psq<sup>rum</sup>* germline clones produce terminal phenotypes even when somatic follicle cells are wild-type as detected by the absence of *dec<sup>-</sup>* clones. (A) and (C) are dark-field images. (B) and (D) are phase-contrast images of the embryos shown in (A) and (C), respectively.
